# Supplementary material for: Visible-light-sensitized highly luminescent europium nanoparticles: preparation and application for time-gated luminescence bioimaging
Source: Royal Society of Chemistry journal article supplement (doi:10.1039/b815999h), 2009-01-01
Supplement: b815999h.pdf [file b815999h.pdf]

## Electronic supplementary information

### Visible-light-sensitized highly luminescent europium nanoparticles: preparation and application for time-gated luminescence bioimaging

Jing Wu, Zhiqiang Ye, Guilan Wang, Dayong Jin, Jingli Yuan, Yafeng Guan, James Piper

#### 1. Experiments

**Materials.** Mouse monoclonal and goat polyclonal anti-human prostate-specific antigen (PSA) antibodies were purchased from OEM Concepts Co. Biotinylated goat anti-human PSA was prepared and used according to a previous method.<sup>1</sup> The standard solutions of human PSA were prepared by diluting human PSA antigen (Biogenesis Ltd.) with 0.05 M Tris-HCl buffer of pH 7.8 containing 5% bovine serum albumin (BSA), 0.9% NaCl, and 0.1% NaN<sub>3</sub>. Unless otherwise stated, all chemical materials were purchased from commercial sources and used without further purification.

**Instruments.** The time-resolved fluoroimmunoassay (TR-FIA) of human PSA was carried out with a FluoroNunc 96-well microtiter plate as solid-phase carrier and measured on a Perkin-Elmer Victor 1420 multilabel counter with the following conditions: excitation wavelength, 340 nm; emission wavelength, 615 nm; delay time, 0.2 ms; and window time (counting time), 0.4 ms. All bright-field imaging, normal luminescence imaging and time-gated luminescence imaging measurements were carried out on a laboratory-use luminescence microscope.<sup>2</sup>

**TR-FIA of Human PSA.** After anti-human PSA monoclonal antibody (diluted to 10 µg /mL with 0.1 M carbonate buffer of pH 9.6) was coated on the wells (50 µL/well) of a 96-well microtiter plate by physical adsorption,<sup>3</sup> 45 µL of human PSA standard solutions were added to the wells. The plate was incubated at 37 °C for 1 h, and washed twice with 0.05 M Tris-HCl buffer of pH 7.8 containing 0.05% Tween 20 and once with 0.05 M Tris-HCl buffer of pH 7.8. Then the biotinylated goat anti-human PSA antibody (~1.1 µg/mL, 45 µL/well) was added to each well, and the plate was incubated at 37 °C for 1 h. After washing, the nanoparticle-labeled SA (~2.0 µg/mL, 45 µL/well) was added to each well, and the plate was incubated at 37 °C for 1 h. The plate was washed four times with 0.05 M Tris-HCl buffer of pH 7.8 containing 0.05% Tween 20, and subjected to solid-phase time-gated luminescence measurement on Perkin-Elmer Victor 1420 multilabel counter.

**Control Experiment of Luminescence Imaging of *Giardia lamblia*.** To confirm the non-specific binding of the nanoparticles on *Giardia* cysts, a control experiment in the absence of anti-*Giardia*

antibody was carried out. Five  $\mu\text{L}$  of *Giardia lamblia* solution ( $2 \times 10^6$  cysts/mL) was mixed with 16  $\mu\text{L}$  of biotinylated rabbit anti-mouse antibody (50  $\mu\text{g/mL}$ ) and 6  $\mu\text{L}$  of the nanoparticle-labeled SA solution ( $\sim 30$   $\mu\text{g/mL}$ ) in a tube. After incubation for 24 h at room temperature, the cysts were separated by centrifugation at 500 rpm and washed with distilled water three times to remove the unreacted nanoparticle-SA conjugate. The cysts were diluted with distilled water, and then spotted on a glass slide for luminescence microscopy imaging detection.

## 2. Results

**Effect of pH on the luminescence intensity of the nanoparticles.** The effect of pH on the luminescence intensity of the nanoparticles was measured in 0.05 M Tris-HCl buffers with different pHs (from 2 to 11). As shown in Figure S1, the effect of pH on luminescence intensity is small in the range of pH 6.0 to 11.0 (intensity change less than 10%), which indicates that the luminescence of the nanoparticles is stable in physiological pH range.

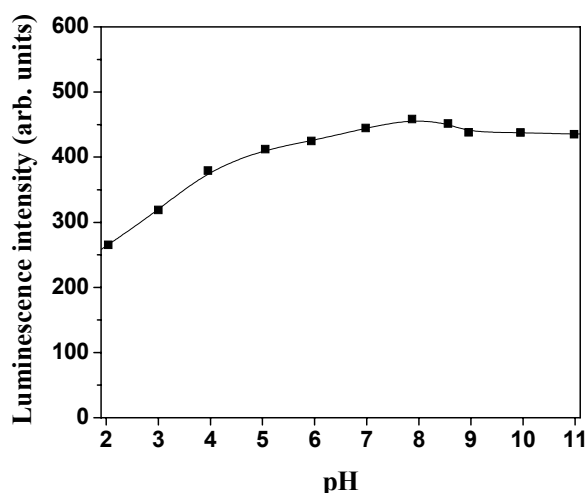

**Figure S1.** Effect of pH on the luminescence intensity of the nanoparticles.

**TR-FIA of Human PSA.** The PSA in human serum as an important tumor marker has been widely accepted and used in the diagnosis of prostatic cancer,<sup>4,5</sup> and had been measured with various immunoassays including enzyme immunoassay,<sup>6</sup> chemiluminescence immunoassay<sup>7</sup> and TR-FIA.<sup>1,8</sup> Herein, the immunoassay of PSA was used to confirm the reactivity of the nanoparticle-labeled SA with biotinylated and to evaluate the usefulness of the nanoparticle-labeled SA for TR-FIA. The calibration curve of TR-FIA for human PSA is shown in Figure S2. The straight line in the PSA concentration range of 0.01-5 ng/mL can be expressed as  $\log(\text{signal}) = 0.735 \log[\text{PSA}] + 4.843$  ( $r =$

0.996). The detection limit, calculated with the concentration corresponding to three standard deviations of background signal, is 29.8 pg/mL, which is obviously higher than the detection limits of commercially available PSA assay methods. This result indicates that the new nanoparticles can be used as a label for highly sensitive TR-FIA.

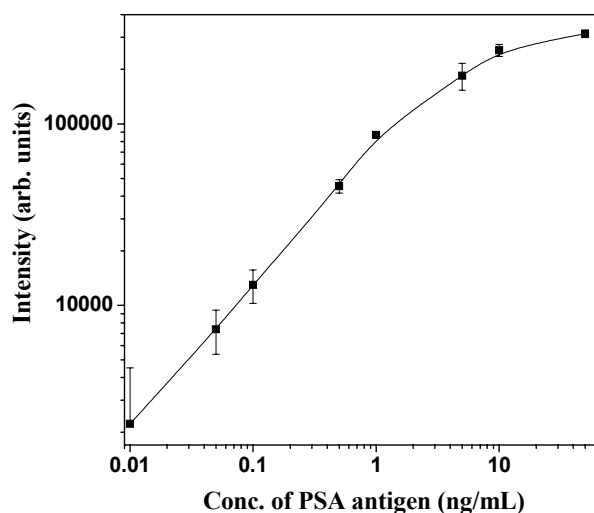

**Figure S2.** Calibration curve of TR-FIA for human PSA by using the nanoparticle-labeled SA.

**Control experiment of Luminescence Imaging of *Giardia lamblia*.** The control experiment in the absence of the anti-*Giardia* antibody by luminescence imaging method was conducted to explore the non-specific binding of the nanoparticles on *Giardia* cysts. The results shown in Figure S3 indicate that the non-specific binding of the nanoparticles on *Giardia* cysts does not occur in the absence of the anti-*Giardia* antibody.

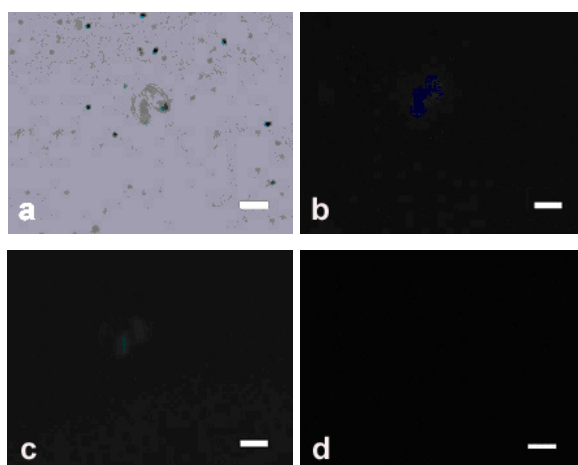

**Figure S3.** Bright-field (a), luminescence (b, c, excited with 330-380 nm and 380-420 nm, respectively) and time-gated luminescence (d, excited with 330-380 nm) images of *Giardia lamblia* stained by

biotinylated rabbit anti-mouse antibody and nanoparticle-labeled SA . without anti-*Giardia* antibody. Scale bars, 10  $\mu\text{m}$ . The microscope equipped with a 100 W mercury lamp, a UV-2A filters (excitation filter, 330-380 nm; dichroic mirror, 400 nm; emission filter,  $> 420$  nm), a V-2A filters (excitation filter, 380-420 nm; dichroic mirror, 430 nm; emission filter,  $> 450$  nm) and a color CCD camera system was used for the normal luminescence imaging measurement with an exposure time of 6 s. The microscope equipped with a 30 W xenon flashlamp, a UV-2A filters, and a time-gated digital black-and-white CCD camera system was used for the time-gated luminescence imaging measurement with the conditions of delay time, 100  $\mu\text{s}$ ; gate time, 1 ms; lamp pulse width, 6  $\mu\text{s}$ ; and exposure time, 240 s. The microscope equipped with a 30 W halogen lamp, and the color CCD was used for the bright-field imaging measurement with an exposure time of 0.3 s.

## References

1. Z. Q. Ye, M. Q. Tan, G. L. Wang and J. L. Yuan, *Anal. Chem.*, 2004, **76**, 513-518.
2. B. Song, G. L. Wang, M. Q. Tan and J. L. Yuan, *J. Am. Chem. Soc.*, 2006, **128**, 13442-13450.
3. K. Matsumoto, J. L. Yuan, G. L. Wang and H. Kimura, *Anal. Biochem.*, 1999, **276**, 81-87.
4. D. A. Armbruster, *Clin. Chem.*, 1993, **39**, 181-195.
5. R. A. Ferguson, H. Yu, M. Kalyvas, S. Zammit and E. P. Diamandis, *Clin. Chem.*, 1996, **42**, 675-684.
6. R. L. Vessella, J. Noteboom and P. H. Lange, *Clin. Chem.*, 1992, **38**, 2044-2054.
7. R. F. Dudley, *Lab. Med.*, 1990, **21**, 216-222.
8. Q.-P. Qin, T. Lövgren and K. Pettersson, *Anal. Chem.*, 2001, **73**, 1521-1529.
